# Supplementary material for: An absorption spectrophotometer compatible paper-based thin-layer cuvette with an integrated pneumatic pump
Source: Royal Society of Chemistry journal article supplement (doi:10.1039/d1ay01138c), 2021-01-01
Supplement: d1ay01138c1.pdf [file d1ay01138c1.pdf]

*Supporting Information for*

**An absorption spectrophotometer-compatible  
paper-based thin-layer cuvette with an  
integrated-pneumatic pump**

Kotaro Morita,\* Honomi Koiso, Reina Kudo and Naoki Hirayama

*Department of Chemistry, Faculty of Science, Toho University, Miyama 2-2-1, Funabashi 274-8510, Japan*

<sup>†</sup>To whom correspondence should be addressed. E-mail: kotaro@sci.toho-u.ac.jp

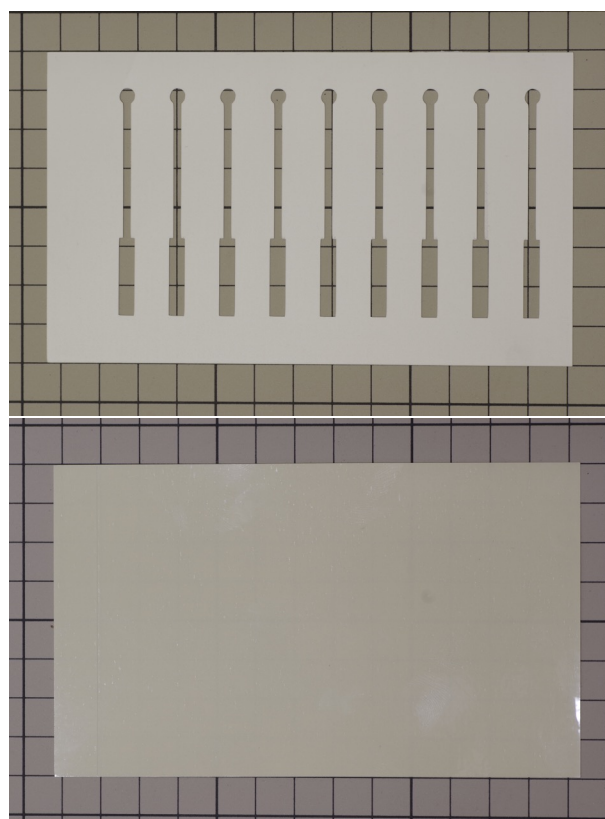

Fig. S1. Photographs of (upper) nine shapes of paper-based cuvettes in parallel-cut in a polypropylene substrate and (lower) a conventional PET seal tape for 96-well plate (135 mm× 90 mm) with a light cream-colored release paper.

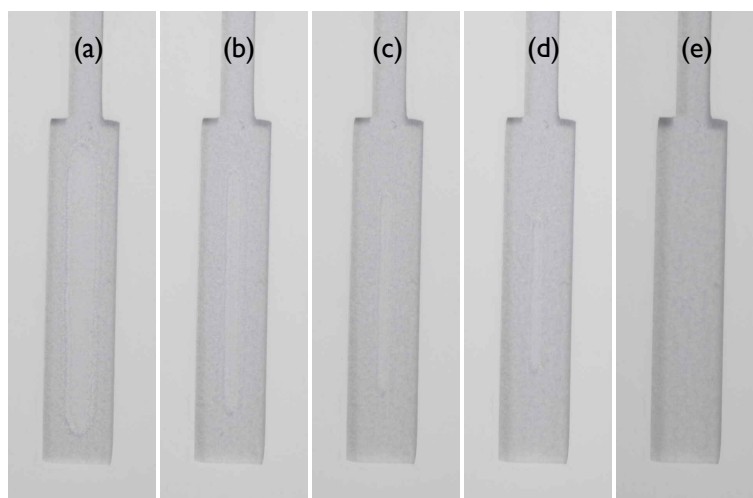

Fig. S2. Sequential photographs of a pump of a paper-based cuvette (a)-(e) after releasing of a finger from the pump.

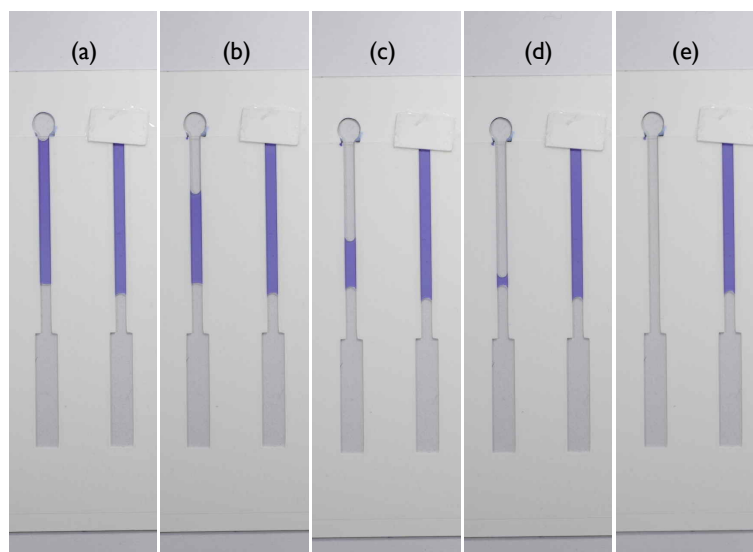

Fig. S3. (a) Photographs of paper-based cuvettes containing aqueous solutions of BPB (left) without and (right) with closing of the reservoir; (b)-(e) sequential pictures at an interval of 1 h after the sample introduction.
